# Supplementary material
Source: ML conference proceedings conference paper supplement (https://proceedings.mlr.press/v139/baranwal21a.html)
Supplement: Supplementary file 1 [file baranwal21a-supp.zip]

Archive with 76 entries (60 files):
- supplementary/
- __MACOSX/._supplementary
- supplementary/.DS_Store
- __MACOSX/supplementary/._.DS_Store
- supplementary/code/
- __MACOSX/supplementary/._code
- supplementary/supplementary.pdf
- __MACOSX/supplementary/._supplementary.pdf
- supplementary/code/loss_vs_density.ipynb
- __MACOSX/supplementary/code/._loss_vs_density.ipynb
- supplementary/code/out-of-distribution_real_data.ipynb
- __MACOSX/supplementary/code/._out-of-distribution_real_data.ipynb
- supplementary/code/out-of-distribution_CSBM.ipynb
- __MACOSX/supplementary/code/._out-of-distribution_CSBM.ipynb
- supplementary/code/.DS_Store
- __MACOSX/supplementary/code/._.DS_Store
- supplementary/code/loss_vs_mean_distance.ipynb
- __MACOSX/supplementary/code/._loss_vs_mean_distance.ipynb
- supplementary/code/.ipynb_checkpoints/
- __MACOSX/supplementary/code/._.ipynb_checkpoints
- supplementary/code/data/
- supplementary/code/.ipynb_checkpoints/out-of-distribution_CSBM-checkpoint.ipynb
- __MACOSX/supplementary/code/.ipynb_checkpoints/._out-of-distribution_CSBM-checkpoint.ipynb
- supplementary/code/.ipynb_checkpoints/loss_vs_density-checkpoint.ipynb
- __MACOSX/supplementary/code/.ipynb_checkpoints/._loss_vs_density-checkpoint.ipynb
- supplementary/code/.ipynb_checkpoints/loss_vs_mean_distance-checkpoint.ipynb
- __MACOSX/supplementary/code/.ipynb_checkpoints/._loss_vs_mean_distance-checkpoint.ipynb
- supplementary/code/data/WikipediaNetwork/
- supplementary/code/data/Cora/
- supplementary/code/data/PubMed/
- supplementary/code/data/WikipediaNetwork/chameleon/
- supplementary/code/data/Cora/Cora/
- supplementary/code/data/PubMed/PubMed/
- supplementary/code/data/WikipediaNetwork/chameleon/processed/
- supplementary/code/data/WikipediaNetwork/chameleon/raw/
- supplementary/code/data/Cora/Cora/processed/
- supplementary/code/data/Cora/Cora/raw/
- supplementary/code/data/PubMed/PubMed/processed/
- supplementary/code/data/PubMed/PubMed/raw/
- supplementary/code/data/WikipediaNetwork/chameleon/processed/pre_transform.pt
- supplementary/code/data/WikipediaNetwork/chameleon/processed/pre_filter.pt
- supplementary/code/data/WikipediaNetwork/chameleon/processed/data.pt
- supplementary/code/data/WikipediaNetwork/chameleon/raw/chameleon_split_0.6_0.2_1.npz
- supplementary/code/data/WikipediaNetwork/chameleon/raw/chameleon_split_0.6_0.2_0.npz
- supplementary/code/data/WikipediaNetwork/chameleon/raw/chameleon_split_0.6_0.2_2.npz
- supplementary/code/data/WikipediaNetwork/chameleon/raw/chameleon_split_0.6_0.2_3.npz
- supplementary/code/data/WikipediaNetwork/chameleon/raw/chameleon_split_0.6_0.2_7.npz
- supplementary/code/data/WikipediaNetwork/chameleon/raw/chameleon_split_0.6_0.2_6.npz
- supplementary/code/data/WikipediaNetwork/chameleon/raw/chameleon_split_0.6_0.2_4.npz
- supplementary/code/data/WikipediaNetwork/chameleon/raw/out1_graph_edges.txt
- supplementary/code/data/WikipediaNetwork/chameleon/raw/chameleon_split_0.6_0.2_5.npz
- supplementary/code/data/WikipediaNetwork/chameleon/raw/out1_node_feature_label.txt
- supplementary/code/data/WikipediaNetwork/chameleon/raw/chameleon_split_0.6_0.2_8.npz
- supplementary/code/data/WikipediaNetwork/chameleon/raw/chameleon_split_0.6_0.2_9.npz
- supplementary/code/data/Cora/Cora/processed/pre_transform.pt
- supplementary/code/data/Cora/Cora/processed/pre_filter.pt
- supplementary/code/data/Cora/Cora/processed/data.pt
- supplementary/code/data/Cora/Cora/raw/ind.cora.ally
- supplementary/code/data/Cora/Cora/raw/ind.cora.test.index
- supplementary/code/data/Cora/Cora/raw/ind.cora.allx
- supplementary/code/data/Cora/Cora/raw/ind.cora.tx
- supplementary/code/data/Cora/Cora/raw/ind.cora.ty
- supplementary/code/data/Cora/Cora/raw/ind.cora.graph
- supplementary/code/data/Cora/Cora/raw/ind.cora.x
- supplementary/code/data/Cora/Cora/raw/ind.cora.y
- supplementary/code/data/PubMed/PubMed/processed/pre_transform.pt
- supplementary/code/data/PubMed/PubMed/processed/pre_filter.pt
- supplementary/code/data/PubMed/PubMed/processed/data.pt
- supplementary/code/data/PubMed/PubMed/raw/ind.pubmed.graph
- supplementary/code/data/PubMed/PubMed/raw/ind.pubmed.test.index
- supplementary/code/data/PubMed/PubMed/raw/ind.pubmed.ally
- supplementary/code/data/PubMed/PubMed/raw/ind.pubmed.allx
- supplementary/code/data/PubMed/PubMed/raw/ind.pubmed.x
- supplementary/code/data/PubMed/PubMed/raw/ind.pubmed.tx
- supplementary/code/data/PubMed/PubMed/raw/ind.pubmed.ty
- supplementary/code/data/PubMed/PubMed/raw/ind.pubmed.y
