# Supplementary material
Source: ML conference proceedings conference paper supplement (https://proceedings.mlr.press/v139/baranwal21a.html)
Supplement: Supplementary file 1 [file baranwal21a-supp.zip › supplementary/code/data/Cora/Cora/raw/ind.cora.test.index]

2692
2532
2050
1715
2362
2609
2622
1975
2081
1767
2263
1725
2588
2259
2357
1998
2574
2179
2291
2382
1812
1751
2422
1937
2631
2510
2378
2589
2345
1943
1850
2298
1825
2035
2507
2313
1906
1797
2023
2159
2495
1886
2122
2369
2461
1925
2565
1858
2234
2000
1846
2318
1723
2559
2258
1763
1991
1922
2003
2662
2250
2064
2529
1888
2499
2454
2320
2287
2203
2018
2002
2632
2554
2314
2537
1760
2088
2086
2218
2605
1953
2403
1920
2015
2335
2535
1837
2009
1905
2636
1942
2193
2576
2373
1873
2463
2509
1954
2656
2455
2494
2295
2114
2561
2176
2275
2635
2442
2704
2127
2085
2214
2487
1739
2543
1783
2485
2262
2472
2326
1738
2170
2100
2384
2152
2647
2693
2376
1775
1726
2476
2195
1773
1793
2194
2581
1854
2524
1945
1781
1987
2599
1744
2225
2300
1928
2042
2202
1958
1816
1916
2679
2190
1733
2034
2643
2177
1883
1917
1996
2491
2268
2231
2471
1919
1909
2012
2522
1865
2466
2469
2087
2584
2563
1924
2143
1736
1966
2533
2490
2630
1973
2568
1978
2664
2633
2312
2178
1754
2307
2480
1960
1742
1962
2160
2070
2553
2433
1768
2659
2379
2271
1776
2153
1877
2027
2028
2155
2196
2483
2026
2158
2407
1821
2131
2676
2277
2489
2424
1963
1808
1859
2597
2548
2368
1817
2405
2413
2603
2350
2118
2329
1969
2577
2475
2467
2425
1769
2092
2044
2586
2608
1983
2109
2649
1964
2144
1902
2411
2508
2360
1721
2005
2014
2308
2646
1949
1830
2212
2596
1832
1735
1866
2695
1941
2546
2498
2686
2665
1784
2613
1970
2021
2211
2516
2185
2479
2699
2150
1990
2063
2075
1979
2094
1787
2571
2690
1926
2341
2566
1957
1709
1955
2570
2387
1811
2025
2447
2696
2052
2366
1857
2273
2245
2672
2133
2421
1929
2125
2319
2641
2167
2418
1765
1761
1828
2188
1972
1997
2419
2289
2296
2587
2051
2440
2053
2191
1923
2164
1861
2339
2333
2523
2670
2121
1921
1724
2253
2374
1940
2545
2301
2244
2156
1849
2551
2011
2279
2572
1757
2400
2569
2072
2526
2173
2069
2036
1819
1734
1880
2137
2408
2226
2604
1771
2698
2187
2060
1756
2201
2066
2439
1844
1772
2383
2398
1708
1992
1959
1794
2426
2702
2444
1944
1829
2660
2497
2607
2343
1730
2624
1790
1935
1967
2401
2255
2355
2348
1931
2183
2161
2701
1948
2501
2192
2404
2209
2331
1810
2363
2334
1887
2393
2557
1719
1732
1986
2037
2056
1867
2126
1932
2117
1807
1801
1743
2041
1843
2388
2221
1833
2677
1778
2661
2306
2394
2106
2430
2371
2606
2353
2269
2317
2645
2372
2550
2043
1968
2165
2310
1985
2446
1982
2377
2207
1818
1913
1766
1722
1894
2020
1881
2621
2409
2261
2458
2096
1712
2594
2293
2048
2359
1839
2392
2254
1911
2101
2367
1889
1753
2555
2246
2264
2010
2336
2651
2017
2140
1842
2019
1890
2525
2134
2492
2652
2040
2145
2575
2166
1999
2434
1711
2276
2450
2389
2669
2595
1814
2039
2502
1896
2168
2344
2637
2031
1977
2380
1936
2047
2460
2102
1745
2650
2046
2514
1980
2352
2113
1713
2058
2558
1718
1864
1876
2338
1879
1891
2186
2451
2181
2638
2644
2103
2591
2266
2468
1869
2582
2674
2361
2462
1748
2215
2615
2236
2248
2493
2342
2449
2274
1824
1852
1870
2441
2356
1835
2694
2602
2685
1893
2544
2536
1994
1853
1838
1786
1930
2539
1892
2265
2618
2486
2583
2061
1796
1806
2084
1933
2095
2136
2078
1884
2438
2286
2138
1750
2184
1799
2278
2410
2642
2435
1956
2399
1774
2129
1898
1823
1938
2299
1862
2420
2673
1984
2204
1717
2074
2213
2436
2297
2592
2667
2703
2511
1779
1782
2625
2365
2315
2381
1788
1714
2302
1927
2325
2506
2169
2328
2629
2128
2655
2282
2073
2395
2247
2521
2260
1868
1988
2324
2705
2541
1731
2681
2707
2465
1785
2149
2045
2505
2611
2217
2180
1904
2453
2484
1871
2309
2349
2482
2004
1965
2406
2162
1805
2654
2007
1947
1981
2112
2141
1720
1758
2080
2330
2030
2432
2089
2547
1820
1815
2675
1840
2658
2370
2251
1908
2029
2068
2513
2549
2267
2580
2327
2351
2111
2022
2321
2614
2252
2104
1822
2552
2243
1798
2396
2663
2564
2148
2562
2684
2001
2151
2706
2240
2474
2303
2634
2680
2055
2090
2503
2347
2402
2238
1950
2054
2016
1872
2233
1710
2032
2540
2628
1795
2616
1903
2531
2567
1946
1897
2222
2227
2627
1856
2464
2241
2481
2130
2311
2083
2223
2284
2235
2097
1752
2515
2527
2385
2189
2283
2182
2079
2375
2174
2437
1993
2517
2443
2224
2648
2171
2290
2542
2038
1855
1831
1759
1848
2445
1827
2429
2205
2598
2657
1728
2065
1918
2427
2573
2620
2292
1777
2008
1875
2288
2256
2033
2470
2585
2610
2082
2230
1915
1847
2337
2512
2386
2006
2653
2346
1951
2110
2639
2520
1939
2683
2139
2220
1910
2237
1900
1836
2197
1716
1860
2077
2519
2538
2323
1914
1971
1845
2132
1802
1907
2640
2496
2281
2198
2416
2285
1755
2431
2071
2249
2123
1727
2459
2304
2199
1791
1809
1780
2210
2417
1874
1878
2116
1961
1863
2579
2477
2228
2332
2578
2457
2024
1934
2316
1841
1764
1737
2322
2239
2294
1729
2488
1974
2473
2098
2612
1834
2340
2423
2175
2280
2617
2208
2560
1741
2600
2059
1747
2242
2700
2232
2057
2147
2682
1792
1826
2120
1895
2364
2163
1851
2391
2414
2452
1803
1989
2623
2200
2528
2415
1804
2146
2619
2687
1762
2172
2270
2678
2593
2448
1882
2257
2500
1899
2478
2412
2107
1746
2428
2115
1800
1901
2397
2530
1912
2108
2206
2091
1740
2219
1976
2099
2142
2671
2668
2216
2272
2229
2666
2456
2534
2697
2688
2062
2691
2689
2154
2590
2626
2390
1813
2067
1952
2518
2358
1789
2076
2049
2119
2013
2124
2556
2105
2093
1885
2305
2354
2135
2601
1770
1995
2504
1749
2157
