# Supplementary material
Source: ML conference proceedings conference paper supplement (https://proceedings.mlr.press/v139/baranwal21a.html)
Supplement: Supplementary file 1 [file baranwal21a-supp.zip › supplementary/code/data/PubMed/PubMed/raw/ind.pubmed.test.index]

18747
19392
19181
18843
19221
18962
19560
19097
18966
19014
18756
19313
19000
19569
19359
18854
18970
19073
19661
19180
19377
18750
19401
18788
19224
19447
19017
19241
18890
18908
18965
19001
18849
19641
18852
19222
19172
18762
19156
19162
18856
18763
19318
18826
19712
19192
19695
19030
19523
19249
19079
19232
19455
18743
18800
19071
18885
19593
19394
19390
18832
19445
18838
19632
19548
19546
18825
19498
19266
19117
19595
19252
18730
18913
18809
19452
19520
19274
19555
19388
18919
19099
19637
19403
18720
19526
18905
19451
19408
18923
18794
19322
19431
18912
18841
19239
19125
19258
19565
18898
19482
19029
18778
19096
19684
19552
18765
19361
19171
19367
19623
19402
19327
19118
18888
18726
19510
18831
19490
19576
19050
18729
18896
19246
19012
18862
18873
19193
19693
19474
18953
19115
19182
19269
19116
18837
18872
19007
19212
18798
19102
18772
19660
19511
18914
18886
19672
19360
19213
18810
19420
19512
18719
19432
19350
19127
18782
19587
18924
19488
18781
19340
19190
19383
19094
18835
19487
19230
18791
18882
18937
18928
18755
18802
19516
18795
18786
19273
19349
19398
19626
19130
19351
19489
19446
18959
19025
18792
18878
19304
19629
19061
18785
19194
19179
19210
19417
19583
19415
19443
18739
19662
18904
18910
18901
18960
18722
18827
19290
18842
19389
19344
18961
19098
19147
19334
19358
18829
18984
18931
18742
19320
19111
19196
18887
18991
19469
18990
18876
19261
19270
19522
19088
19284
19646
19493
19225
19615
19449
19043
19674
19391
18918
19155
19110
18815
19131
18834
19715
19603
19688
19133
19053
19166
19066
18893
18757
19582
19282
19257
18869
19467
18954
19371
19151
19462
19598
19653
19187
19624
19564
19534
19581
19478
18985
18746
19342
18777
19696
18824
19138
18728
19643
19199
18731
19168
18948
19216
19697
19347
18808
18725
19134
18847
18828
18996
19106
19485
18917
18911
18776
19203
19158
18895
19165
19382
18780
18836
19373
19659
18947
19375
19299
18761
19366
18754
19248
19416
19658
19638
19034
19281
18844
18922
19491
19272
19341
19068
19332
19559
19293
18804
18933
18935
19405
18936
18945
18943
18818
18797
19570
19464
19428
19093
19433
18986
19161
19255
19157
19046
19292
19434
19298
18724
19410
19694
19214
19640
19189
18963
19218
19585
19041
19550
19123
19620
19376
19561
18944
19706
19056
19283
18741
19319
19144
19542
18821
19404
19080
19303
18793
19306
19678
19435
19519
19566
19278
18946
19536
19020
19057
19198
19333
19649
19699
19399
19654
19136
19465
19321
19577
18907
19665
19386
19596
19247
19473
19568
19355
18925
19586
18982
19616
19495
19612
19023
19438
18817
19692
19295
19414
19676
19472
19107
19062
19035
18883
19409
19052
19606
19091
19651
19475
19413
18796
19369
19639
19701
19461
19645
19251
19063
19679
19545
19081
19363
18995
19549
18790
18855
18833
18899
19395
18717
19647
18768
19103
19245
18819
18779
19656
19076
18745
18971
19197
19711
19074
19128
19466
19139
19309
19324
18814
19092
19627
19060
18806
18929
18737
18942
18906
18858
19456
19253
19716
19104
19667
19574
18903
19237
18864
19556
19364
18952
19008
19323
19700
19170
19267
19345
19238
18909
18892
19109
19704
18902
19275
19680
18723
19242
19112
19169
18956
19343
19650
19541
19698
19521
19087
18976
19038
18775
18968
19671
19412
19407
19573
19027
18813
19357
19460
19673
19481
19036
19614
18787
19195
18732
18884
19613
19657
19575
19226
19589
19234
19617
19707
19484
18740
19424
18784
19419
19159
18865
19105
19315
19480
19664
19378
18803
19605
18870
19042
19426
18848
19223
19509
19532
18752
19691
18718
19209
19362
19090
19492
19567
19687
19018
18830
19530
19554
19119
19442
19558
19527
19427
19291
19543
19422
19142
18897
18950
19425
19002
19588
18978
19551
18930
18736
19101
19215
19150
19263
18949
18974
18759
19335
19200
19129
19328
19437
18988
19429
19368
19406
19049
18811
19296
19256
19385
19602
18770
19337
19580
19476
19045
19132
19089
19120
19265
19483
18767
19227
18934
19069
18820
19006
19459
18927
19037
19280
19441
18823
19015
19114
19618
18957
19176
18853
19648
19201
19444
19279
18751
19302
19505
18733
19601
19533
18863
19708
19387
19346
19152
19206
18851
19338
19681
19380
19055
18766
19085
19591
19547
18958
19146
18840
19051
19021
19207
19235
19086
18979
19300
18939
19100
19619
19287
18980
19277
19326
19108
18920
19625
19374
19078
18734
19634
19339
18877
19423
19652
19683
19044
18983
19330
19529
19714
19468
19075
19540
18839
19022
19286
19537
19175
19463
19167
19705
19562
19244
19486
19611
18801
19178
19590
18846
19450
19205
19381
18941
19670
19185
19504
19633
18997
19113
19397
19636
19709
19289
19264
19353
19584
19126
18938
19669
18964
19276
18774
19173
19231
18973
18769
19064
19040
19668
18738
19082
19655
19236
19352
19609
19628
18951
19384
19122
18875
18992
18753
19379
19254
19301
19506
19135
19010
19682
19400
19579
19316
19553
19208
19635
19644
18891
19024
18989
19250
18850
19317
18915
19607
18799
18881
19479
19031
19365
19164
18744
18760
19502
19058
19517
18735
19448
19243
19453
19285
18857
19439
19016
18975
19503
18998
18981
19186
18994
19240
19631
19070
19174
18900
19065
19220
19229
18880
19308
19372
19496
18771
19325
19538
19033
18874
19077
19211
18764
19458
19571
19121
19019
19059
19497
18969
19666
19297
19219
19622
19184
18977
19702
19539
19329
19095
19675
18972
19514
19703
19188
18866
18812
19314
18822
18845
19494
19411
18916
19686
18967
19294
19143
19204
18805
19689
19233
18758
18748
19011
19685
19336
19608
19454
19124
18868
18807
19544
19621
19228
19154
19141
19145
19153
18860
19163
19393
19268
19160
19305
19259
19471
19524
18783
19396
18894
19430
19690
19348
19597
19592
19677
18889
19331
18773
19137
19009
18932
19599
18816
19054
19067
19477
19191
18921
18940
19578
19183
19004
19072
19710
19005
19610
18955
19457
19148
18859
18993
19642
19047
19418
19535
19600
19312
19039
19028
18879
19003
19026
19013
19149
19177
19217
18987
19354
19525
19202
19084
19032
18749
18867
19048
18999
19260
19630
18727
19356
19083
18926
18789
19370
18861
19311
19557
19531
19436
19140
19310
19501
18721
19604
19713
19262
19563
19507
19440
19572
19513
19515
19518
19421
19470
19499
19663
19508
18871
19528
19500
19307
19288
19594
19271
