# Supplementary material
Source: ML conference proceedings conference paper supplement (https://proceedings.mlr.press/v139/baranwal21a.html)
Supplement: Supplementary file 1 [file baranwal21a-supp.zip › supplementary/code/data/WikipediaNetwork/chameleon/raw/out1_graph_edges.txt]

node_id	node_id
2034	1939
2034	2263
2034	1976
2034	2234
2034	804
2034	1474
2034	2110
2034	652
2034	1350
2034	1860
2034	2243
2034	1889
2034	1356
2034	536
1747	1554
1747	1843
1747	1612
1747	1776
1747	1911
817	115
319	760
319	1398
319	2165
319	1530
319	1023
319	897
319	2042
319	1409
319	1918
319	1921
319	1285
319	2175
319	2053
319	2192
319	1303
319	2199
319	296
319	2204
319	1569
319	1321
319	2221
319	443
319	2223
319	699
319	2225
319	572
319	956
319	829
319	1344
319	841
319	970
319	1606
319	1988
319	1224
319	1232
319	1492
319	1622
319	1750
319	1495
319	2134
319	373
319	1247
319	993
319	1887
319	2013
319	1762
319	366
319	1127
319	1895
319	370
319	1898
319	1013
28	95
28	1204
28	1877
28	1435
28	2109
28	2113
28	115
28	1512
28	2187
777	1907
777	1939
777	1081
777	1976
777	2009
777	1854
777	2043
777	360
777	2217
777	1474
777	1665
777	2208
777	1986
777	1454
777	1841
777	2249
777	1233
777	2093
1967	1401
1967	767
1967	1854
1967	776
1967	2208
1967	2249
1615	1714
1615	2275
1615	1640
1615	1288
1615	1162
1615	1961
1615	2153
1615	2026
1615	880
1502	1940
1502	764
1502	797
1502	1306
1502	164
1502	2167
1502	992
1502	2171
1502	2172
1502	965
1502	746
1502	1837
153	2140
912	33
912	1462
912	2195
912	2263
912	1976
912	2208
912	1989
912	2246
912	1356
1642	1333
1642	954
1642	1147
1642	674
1642	1976
1642	2234
1642	2203
1642	204
1642	2110
1642	1860
1642	1866
1642	186
1642	339
1642	1674
1642	1356
1642	1741
1642	536
1642	2246
1382	404
1382	606
1382	1717
1382	2186
1382	1241
2021	1939
2021	2230
2021	2044
2021	2249
2021	1706
2021	1198
2021	1454
2021	2218
2021	1233
2021	1741
1441	676
1441	1741
1441	1939
306	1789
306	1939
306	1741
1518	1939
1518	546
1518	2263
1518	1976
1518	1132
1518	2088
1518	2249
1518	1741
390	935
390	2175
390	1414
390	1880
1628	460
1628	1830
1628	908
1628	1584
1481	1333
1481	954
1481	1147
1481	674
1481	1976
1481	2234
1481	2203
1481	204
1481	2110
1481	1860
1481	1866
1481	186
1481	339
1481	1674
1481	1356
1481	1741
1481	536
1481	2246
1732	776
1732	2163
463	2263
463	1976
463	1741
463	2266
1014	924
1014	2164
1014	1561
1014	1974
1014	1632
1014	652
1014	1932
1014	2253
195	33
195	1462
195	2195
195	2260
195	2003
195	2263
195	1976
195	1565
195	650
195	1384
195	122
195	1356
195	186
1969	1333
1969	954
1969	1147
1969	674
1969	1976
1969	2234
1969	2203
1969	204
1969	2110
1969	1860
1969	1866
1969	186
1969	339
1969	1674
1969	1356
1969	1741
1969	536
1969	2246
297	1748
297	867
297	77
297	1761
297	2014
297	2123
297	187
623	1384
976	935
976	2175
976	1414
976	1880
460	1634
460	1628
460	1758
460	908
460	1584
2024	2159
2024	1400
2024	1402
2024	8
2024	1408
2024	1917
2024	520
2024	1799
2024	2190
2024	1555
2024	1062
2024	683
2024	2212
2024	2213
2024	687
2024	1835
2024	813
2024	1077
2024	2094
2024	2157
2024	2097
2024	2105
2024	1860
2024	2246
2024	1356
2024	977
2024	850
2024	2133
2024	614
2024	2266
2024	2276
2024	378
2024	633
1072	1274
1072	519
1072	1032
1072	1678
1072	1939
1072	924
1072	1951
1072	1572
1072	1202
1072	2227
1072	1976
1072	456
1072	1345
1072	204
1072	967
1072	1983
1072	595
1072	1741
1072	1487
1072	2252
1072	2260
1072	2263
1072	1889
1072	1259
1072	1771
2029	893
2029	2029
456	2159
456	1660
456	272
456	535
456	917
456	1937
456	1939
456	1942
456	1945
456	170
456	1442
456	683
456	1333
456	700
456	2097
456	826
456	1976
456	1741
456	2263
456	866
456	1252
456	999
456	622
456	378
1693	1427
1693	1812
1693	1017
1693	1718
1693	2197
1693	1980
1693	108
1693	2268
1693	1856
1693	2240
1693	2272
1693	1664
1693	775
1693	1265
1293	1427
1293	1017
1293	1718
1293	2197
1293	1693
1293	1980
1293	2268
1293	1856
1293	1919
1293	2240
1293	1414
1293	1664
1293	1930
1293	1265
871	1333
871	954
871	1147
871	674
871	1976
871	2234
871	2203
871	204
871	2110
871	1860
871	1866
871	186
871	339
871	1674
871	1356
871	1741
871	536
871	2246
630	1741
630	1932
630	924
630	1669
1866	2263
1866	1976
1866	776
1866	1860
1866	652
1866	1741
1866	2188
2025	2030
2025	1237
2025	921
2025	2191
2025	351
2025	1714
2025	1900
2025	1425
2025	1340
2025	2090
2025	2145
2025	2177
2025	1288
2025	2275
2025	2209
2025	881
2025	2153
2025	2186
2025	1520
2025	220
2104	1333
2104	1939
2104	2263
2104	1976
2104	363
2104	842
2104	1741
1501	1940
1501	764
1501	797
1501	1306
1501	164
1501	1975
1501	992
1501	2171
1501	2172
1501	965
1501	746
1501	1837
989	1396
989	1400
989	1406
989	2047
989	1286
989	282
989	2190
989	1429
989	1939
989	1686
989	1062
989	1700
989	1954
989	939
989	2211
989	687
989	813
989	943
989	432
989	1838
989	1077
989	189
989	66
989	2105
989	1346
989	1474
989	1985
989	591
989	1356
989	469
989	850
989	977
989	2249
989	1367
989	1753
989	2133
989	738
989	2008
989	614
989	114
989	632
157	1976
157	1854
157	2249
157	1062
157	939
157	1454
770	760
770	1912
770	393
770	1918
770	1920
770	1921
770	1285
770	2177
770	1923
770	1288
770	2179
770	531
770	1547
770	2058
770	921
770	1187
770	1569
770	1066
770	1959
770	2221
770	956
770	220
770	475
770	1492
770	355
770	1510
770	1898
770	2026
209	2246
209	1939
209	2139
209	1752
592	1356
592	1976
592	1939
592	2234
592	2263
544	1939
544	1942
544	1945
544	1976
544	2263
544	456
544	272
544	2246
544	1741
544	117
544	378
1286	2256
1286	1939
1286	546
1286	2263
1286	1976
1286	1915
1286	2249
1286	1741
663	760
663	1912
663	393
663	1918
663	1920
663	1921
663	1285
663	2177
663	1923
663	1288
663	2179
663	531
663	1547
663	2058
663	921
663	1187
663	1569
663	1066
663	1959
663	2221
663	956
663	220
663	475
663	1492
663	355
663	1510
663	1898
663	2026
1350	1014
1350	2230
1350	1854
1350	652
1350	1863
1350	1741
1350	1932
1306	1940
1306	764
1306	797
1306	164
1306	2167
1306	992
1306	1975
1306	2171
1306	2172
1306	965
1306	746
1306	338
1306	1837
203	1331
203	2271
203	1692
203	2078
528	1939
528	862
528	1198
528	1976
528	2009
528	1854
528	584
528	2043
528	1564
528	2249
528	2088
528	2217
528	2028
1553	227
1553	309
1553	2151
1553	2250
1553	600
1553	1553
465	1814
465	1774
465	1085
465	960
465	581
465	1439
465	1090
465	60
465	1152
465	1733
465	2177
465	2115
465	531
465	880
465	1613
465	2058
465	220
1846	382
1846	653
1846	1926
1846	658
1846	413
1846	1173
1846	1939
1846	2194
1846	2065
1846	2068
1846	2067
1846	931
1846	2080
1846	944
1846	1092
1846	1098
1846	719
1846	346
1846	102
1846	1500
1846	1885
1846	2143
1846	1643
669	2158
669	2030
669	637
669	890
669	1912
669	1152
669	393
669	1534
669	1666
669	904
669	905
669	2177
669	1923
669	141
669	276
669	404
669	531
669	660
669	1931
669	2058
669	2186
669	1170
669	1039
669	666
669	1683
669	921
669	1291
669	1814
669	922
669	1520
669	1184
669	1949
669	1567
669	1187
669	2205
669	936
669	2081
669	1066
669	52
669	310
669	1961
669	949
669	2220
669	1714
669	1968
669	1845
669	2228
669	1466
669	960
669	581
669	1727
669	1984
669	1739
669	2122
669	979
669	220
669	2254
669	1875
669	1745
669	351
669	479
669	2004
669	2006
669	1371
669	1633
669	886
669	1639
669	1640
669	881
669	1774
669	505
669	1777
1431	97
1431	387
1431	2077
1431	302
1431	2148
1431	1201
1431	442
553	2263
553	1976
553	1741
553	2266
1361	760
1361	1912
1361	393
1361	1918
1361	1920
1361	1921
1361	1285
1361	2177
1361	1923
1361	1288
1361	2179
1361	531
1361	1547
1361	2058
1361	921
1361	1187
1361	1569
1361	1066
1361	1959
1361	2221
1361	956
1361	220
1361	475
1361	1492
1361	355
1361	1510
1361	1898
1361	2026
1220	760
1220	1398
1220	2165
1220	1530
1220	1023
1220	897
1220	1409
1220	1918
1220	1921
1220	1285
1220	2175
1220	22
1220	2053
1220	1547
1220	1898
1220	2192
1220	1303
1220	2199
1220	296
1220	2204
1220	1569
1220	936
1220	1321
1220	2221
1220	443
1220	2223
1220	699
1220	2225
1220	572
1220	956
1220	829
1220	70
1220	1344
1220	841
1220	970
1220	1606
1220	1988
1220	1224
1220	1232
1220	1492
1220	1111
1220	1622
1220	1750
1220	1495
1220	2134
1220	1247
1220	1887
1220	2013
1220	1762
1220	366
1220	1127
1220	1895
1220	370
1220	373
1220	1011
1220	1013
763	346
9	1333
9	1939
9	1497
9	1054
9	2263
9	1976
9	2235
9	806
9	1356
9	1741
1100	2263
1100	1976
1100	1741
1100	2266
1834	189
1834	1564
1834	2249
1834	584
1834	974
1067	1939
1067	2263
1067	1976
1067	2234
1067	804
1067	1474
1067	2110
1067	652
1067	1350
1067	1860
1067	2243
1067	1889
1067	1356
1067	536
181	2158
181	2030
181	890
181	1912
181	2168
181	776
181	2174
181	1923
181	2179
181	531
181	2058
181	2191
181	1814
181	1949
181	1187
181	936
181	2209
181	1066
181	52
181	1714
181	1476
181	2249
181	979
181	220
181	2254
181	2001
181	355
181	2020
181	2153
1923	2158
1923	2030
1923	637
1923	890
1923	1912
1923	1534
1923	393
1923	1152
1923	1666
1923	904
1923	905
1923	2177
1923	1923
1923	1288
1923	141
1923	2179
1923	531
1923	1164
1923	660
1923	1931
1923	2186
1923	2058
1923	1170
1923	1291
1923	276
1923	2191
1923	921
1923	1683
1923	1814
1923	922
1923	1520
1923	1184
1923	1949
1923	1567
1923	1187
1923	2081
1923	1066
1923	52
1923	1573
1923	310
1923	949
1923	2220
1923	1714
1923	1968
1923	1845
1923	2228
1923	1466
1923	960
1923	1596
1923	1727
1923	1984
1923	2119
1923	1739
1923	2122
1923	979
1923	220
1923	2254
1923	1875
1923	351
1923	479
1923	2004
1923	2006
1923	1371
1923	2174
1923	1633
1923	886
1923	1639
1923	2020
1923	1640
1923	881
1923	505
1923	1777
1603	1905
1603	1
1603	1654
1603	638
1603	1911
1603	1661
1603	1924
1603	1803
1603	2057
1603	555
1603	50
1603	2084
1603	314
1603	820
1603	1843
1603	2095
1603	2226
1603	1720
1603	455
1603	1222
1603	1225
1603	2138
1603	1901
526	1907
526	640
526	2217
526	584
526	2208
526	2249
2238	1333
2238	954
2238	1147
2238	674
2238	1976
2238	2234
2238	2203
2238	204
2238	2110
2238	1860
2238	1866
2238	186
2238	339
2238	1674
2238	1356
2238	1741
2238	536
2238	2246
1977	2020
2119	1714
2119	2191
2119	1666
2119	1476
2119	1288
2119	2275
2119	1640
2119	1961
2119	2090
2119	220
1950	153
942	1829
942	1939
643	1477
643	1915
643	1939
643	1099
644	1406
644	1286
644	1939
644	546
644	806
644	432
644	813
644	66
644	1333
644	1976
644	2105
644	1346
644	842
644	595
644	977
644	2249
644	850
644	1741
644	2133
644	2263
644	1886
644	490
644	2270
644	1132
2187	95
2187	1877
2187	1435
2187	2113
2187	115
2187	1512
2187	28
121	2158
121	2030
121	637
121	890
121	1912
121	1534
121	393
121	1152
121	1666
121	904
121	905
121	2177
121	1923
121	1288
121	141
121	2179
121	531
121	1164
121	660
121	1931
121	2186
121	2058
121	1170
121	1291
121	276
121	2191
121	921
121	1683
121	1814
121	922
121	1520
121	1184
121	1949
121	1567
121	1187
121	2081
121	1066
121	52
121	1573
121	310
121	949
121	2220
121	1714
121	1968
121	1845
121	2228
121	1466
121	960
121	1596
121	1727
121	1984
121	2119
121	1739
121	2122
121	979
121	220
121	2254
121	1875
121	351
121	479
121	2004
121	2006
121	1371
121	2174
121	1633
121	886
121	1639
121	2020
121	1640
121	881
121	505
121	1777
424	1939
424	2162
424	674
424	2263
424	1976
424	1313
424	1860
424	1356
424	2088
424	1741
885	2246
885	2079
885	1939
556	1714
556	1237
556	890
556	1912
556	393
556	2140
556	886
556	1639
556	2020
556	1959
556	1931
556	220
507	1333
507	1939
507	2263
507	1976
507	2246
507	1741
2205	404
2205	1912
2205	1923
2205	52
2205	2179
2205	531
2205	220
747	760
747	1398
747	2165
747	1530
747	1023
747	897
747	2042
747	1409
747	1918
747	1921
747	1285
747	22
747	2053
747	1547
747	2192
747	1303
747	2199
747	296
747	2204
747	1569
747	1321
747	2221
747	443
747	2223
747	699
747	2225
747	572
747	194
747	829
747	956
747	2233
747	1344
747	1599
747	2111
747	841
747	970
747	1606
747	1988
747	1224
747	1232
747	1492
747	1622
747	1750
747	1495
747	2134
747	373
747	1247
747	993
747	1887
747	2013
747	1762
747	366
747	1127
747	1895
747	370
747	1898
747	1013
1809	760
1809	2165
1809	2042
1809	1409
1809	776
1809	2175
1809	1164
1809	1547
1809	2192
1809	1303
1809	2201
1809	1569
1809	2221
1809	2225
1809	956
1809	829
1809	1344
1809	1094
1809	1232
1809	475
1809	2259
1809	993
1809	370
1578	2031
1578	1333
1578	806
1578	1976
728	1919
1787	1402
1787	8
1787	1660
1787	1939
1787	1054
1787	816
1787	1329
1787	1333
1787	826
1787	1976
1787	1469
1787	964
1787	2246
1787	595
1787	1741
1787	117
1787	855
1787	1749
1787	2260
1787	2263
1787	1769
1787	1387
1787	1008
1787	2154
1787	633
829	760
829	1398
829	2165
829	1530
829	1023
829	897
829	1409
829	1918
829	1921
829	1285
829	2175
829	2053
829	1547
829	2192
829	1303
829	2199
829	296
829	2204
829	1569
829	1321
829	2221
829	443
829	2223
829	699
829	2225
829	572
829	956
829	1344
829	841
829	970
829	1606
829	1988
829	1224
829	1232
829	1492
829	1622
829	1750
829	1495
829	2134
829	373
829	1247
829	1887
829	2013
829	1762
829	366
829	1127
829	1895
829	370
829	1898
829	1013
1339	2158
1339	2030
1339	637
1339	890
1339	1912
1339	1534
1339	393
1339	1152
1339	1666
1339	904
1339	905
1339	2177
1339	1923
1339	141
1339	2179
1339	276
1339	1291
1339	1039
1339	660
1339	1931
1339	915
1339	2186
1339	1170
1339	531
1339	1936
1339	1683
1339	921
1339	922
1339	1814
1339	1520
1339	1184
1339	1949
1339	1567
1339	1187
1339	936
1339	2081
1339	1066
1339	52
1339	1068
1339	310
1339	949
1339	2220
1339	1714
1339	1968
1339	1845
1339	2228
1339	1466
1339	324
1339	960
1339	581
1339	1340
1339	1090
1339	1727
1339	1984
1339	1476
1339	465
1339	1739
1339	2122
1339	979
1339	220
1339	2254
1339	1875
1339	1745
1339	1621
1339	479
1339	351
1339	1369
1339	2004
1339	2006
1339	1371
1339	355
1339	2174
1339	1633
1339	886
1339	1639
1339	1640
1339	880
1339	881
1339	1774
1339	505
1339	1777
2073	1939
2073	2162
2073	674
2073	2263
2073	1976
2073	1313
2073	1860
2073	1356
2073	2088
2073	1741
1567	2158
1567	2030
1567	637
1567	890
1567	1912
1567	1534
1567	393
1567	1152
1567	1666
1567	904
1567	905
1567	2177
1567	1923
1567	1288
1567	141
1567	2179
1567	404
1567	531
1567	660
1567	1931
1567	2186
1567	2058
1567	1170
1567	1291
1567	666
1567	2191
1567	921
1567	1683
1567	1814
1567	922
1567	1520
1567	1817
1567	1439
1567	1949
1567	1184
1567	1187
1567	2081
1567	1066
1567	52
1567	310
1567	949
1567	2220
1567	1714
1567	1968
1567	1845
1567	2228
1567	1466
1567	960
1567	1340
1567	1727
1567	1984
1567	2119
1567	1739
1567	1613
1567	2122
1567	979
1567	220
1567	2254
1567	1875
1567	351
1567	479
1567	2004
1567	2006
1567	1371
1567	1633
1567	1639
1567	1640
1567	880
1567	881
1567	276
1567	505
1567	886
1089	760
1089	1398
1089	2165
1089	1530
1089	1023
1089	897
1089	1409
1089	1918
1089	1921
1089	1285
1089	2175
1089	22
1089	2053
1089	1547
1089	1898
1089	2192
1089	1303
1089	2199
1089	296
1089	2204
1089	1569
1089	936
1089	1321
1089	2221
1089	443
1089	2223
1089	699
1089	2225
1089	572
1089	956
1089	829
1089	70
1089	1344
1089	841
1089	970
1089	1606
1089	1988
1089	1224
1089	1232
1089	1492
1089	1111
1089	1622
1089	1750
1089	1495
1089	2134
1089	1247
1089	1887
1089	2013
1089	1762
1089	366
1089	1127
1089	1895
1089	370
1089	373
1089	1011
1089	1013
873	643
873	1286
873	2249
873	993
879	1350
879	2169
879	1939
879	2261
2118	1526
2118	138
2118	427
2118	1634
2118	1703
2118	1324
2118	1708
2118	1426
154	115
154	601
996	404
996	606
996	1717
996	2186
996	1241
1438	935
1438	2175
1438	1414
1438	1880
40	1939
40	924
40	2164
40	2261
40	1974
40	676
40	1976
40	2110
40	1124
40	652
40	1932
316	935
316	2175
316	1414
316	1880
591	1939
591	2263
591	1976
591	1794
591	2088
591	2249
591	1741
1490	1741
1490	1939
1490	2249
1490	2044
447	1905
447	1
447	1911
447	1661
447	1156
447	1803
447	2057
447	1692
447	555
447	50
447	314
447	1843
447	2095
447	2226
447	1847
447	1720
447	1598
447	1222
447	1225
447	2138
447	1759
447	742
447	1901
580	189
580	1753
580	2105
580	1406
580	2249
580	490
580	977
1508	1939
1508	2263
1508	1976
1508	2249
1508	806
1508	1741
1159	935
1159	2175
1159	1414
1159	1880
582	760
582	1268
582	1918
582	2174
582	2175
582	1285
582	2177
582	1288
582	2053
582	1547
582	2192
582	1303
582	1569
582	2221
582	1463
582	829
582	1984
582	1862
582	1102
582	1745
582	2259
582	1895
582	1898
515	2158
515	2030
515	637
515	890
515	1912
515	1152
515	393
515	1534
515	1666
515	904
515	905
515	2177
515	1923
515	141
515	2179
515	276
515	1291
515	531
515	660
515	1931
515	2186
515	2058
515	1170
515	1683
515	921
515	922
515	1814
515	1520
515	1184
515	1949
515	1567
515	1187
515	936
515	2081
515	1066
515	52
515	310
515	949
515	2220
515	1714
515	1968
515	1845
515	2228
515	1466
515	960
515	1727
515	1984
515	1739
515	2122
515	979
515	220
515	2254
515	1875
515	351
515	479
515	2004
515	2006
515	1371
515	1633
515	1639
515	1640
515	881
515	505
515	886
1695	1402
1695	8
1695	1660
1695	1939
1695	1054
1695	816
1695	1329
1695	1333
1695	826
1695	1976
1695	1469
1695	964
1695	2246
1695	595
1695	1741
1695	117
1695	855
1695	1749
1695	2260
1695	2263
1695	1769
1695	1387
1695	1008
1695	2154
1695	633
2097	2263
2097	1976
2097	1939
2097	456
2097	1741
1565	1384
428	1939
428	2263
428	1976
428	2249
428	806
428	1741
1393	2079
1393	2264
2171	1940
2171	764
2171	797
2171	1306
2171	164
2171	2167
2171	992
2171	1975
2171	2172
2171	965
2171	746
2171	1837
672	1333
672	1939
672	2263
672	1976
672	363
672	842
672	1741
1900	1714
1900	2183
1900	1845
1900	637
1900	351
1900	1912
1900	1152
1900	2090
1900	2122
1900	1326
1900	2145
1900	1923
1900	2179
1900	2209
1900	1005
1900	1102
1900	1900
1900	2026
1900	505
1900	220
863	935
863	2175
863	1414
863	1880
651	760
651	1912
651	393
651	1918
651	1920
651	1921
651	1285
651	2177
651	1923
651	1288
651	2179
651	531
651	1547
651	2058
651	921
651	1187
651	1569
651	1066
651	1959
651	2221
651	956
651	220
651	475
651	1492
651	355
651	1510
651	1898
651	2026
1185	115
1185	1958
684	1474
684	2249
1580	1396
1580	1400
1580	1406
1580	2047
1580	1286
1580	282
1580	2190
1580	1429
1580	1939
1580	1686
1580	1062
1580	1700
1580	1954
1580	939
1580	2211
1580	687
1580	813
1580	943
1580	432
1580	1838
1580	1077
1580	189
1580	66
1580	2105
1580	1346
1580	1474
1580	1985
1580	591
1580	1356
1580	469
1580	850
1580	977
1580	2249
1580	1367
1580	1753
1580	2133
1580	738
1580	2008
1580	614
1580	114
1580	632
1911	1905
1911	1
1911	1911
1911	1661
1911	1156
1911	1803
1911	2057
1911	1692
1911	555
1911	50
1911	314
1911	1843
1911	2095
1911	2226
1911	1847
1911	1720
1911	1598
1911	1222
1911	1225
1911	2138
1911	1759
1911	742
1911	1901
410	2159
410	1400
410	1402
410	8
410	1408
410	1917
410	520
410	1799
410	2190
410	1555
410	1062
410	683
410	2212
410	2213
410	687
410	1835
410	813
410	1077
410	2094
410	2157
410	2097
410	2105
410	1860
410	2246
410	1356
410	977
410	850
410	2133
410	614
410	2266
410	2276
410	378
410	633
2226	1905
2226	1
2226	1843
2226	1847
2226	1720
2226	1911
2226	1661
2226	2138
2226	1759
2226	555
2226	1222
2226	50
2226	1924
2226	1225
2226	1803
2226	1901
1976	1939
1976	924
1976	1849
1976	2263
1976	2234
1976	1632
1976	652
1976	1704
1976	2246
1976	1356
1976	1741
1079	2030
1079	890
1079	393
1079	141
1079	2174
1079	2177
1079	1923
1079	1288
1079	1291
1079	2186
1079	2058
1079	1170
1079	666
1079	921
1079	1814
1079	936
1079	2209
1079	1573
1079	1452
1079	2090
1079	1714
1079	2111
1079	1102
1079	220
1079	1237
1079	351
1079	2004
1079	1371
1079	2145
[truncated: 34,102 more rows]
