# Supplementary material
Source: ML conference proceedings conference paper supplement (https://proceedings.mlr.press/v139/baranwal21a.html)
Supplement: Supplementary file 1 [file baranwal21a-supp.zip › supplementary/code/out-of-distribution_real_data.ipynb]

# %% [code]
import numpy as np
import scipy as sp
import torch
import time
import copy
import pickle
import matplotlib
import matplotlib.pyplot as plt
import networkx as nx
import os
import sys
import cvxpy as cp
from itertools import product
sys.path.insert(0, os.path.abspath('../../'))

import torch
from torch_geometric.data import Data
from torch_geometric.utils import to_dense_adj
from torch_geometric.utils import dense_to_sparse

# %% [code]
matplotlib.rcParams['pdf.fonttype'] = 42
matplotlib.rcParams['ps.fonttype'] = 42

# %% [markdown]
# Solver

# %% [code]
def ipm(n_features, mask, max_iter, data, y, verbose, lambda_=1.0e-6):

## Changed to CVX to get better accuracy because simple GD sucks.
    n = len(y[mask])
    w = cp.Variable(n_features + 1) 
    log_likelihood = -lambda_*cp.sum_squares(w) + (cp.sum(cp.multiply(y[mask], (data @ w)[mask]) - cp.logistic((data @ w)[mask])))/n
    objective = cp.Maximize(log_likelihood)
    constraints = [cp.norm(w[0:n_features],2) <= n_features]
    prob = cp.Problem(objective, constraints)
    result = prob.solve(verbose = verbose, reltol=1.0e-10, abstol=1.0e-10, max_iters=max_iter)
    
    return w.value

# %% [markdown]
## Plot function

# %% [code]
def plot_(all_results,x_axis_class,name,n_classes):

    for class_ in range(n_classes):
        
        print("Plot for class: ", chr(65 + class_))

        train_obj_without_graph = all_results[class_][0]
        train_obj_with_graph = all_results[class_][1]
        train_error_without_graph = all_results[class_][2]
        train_error_with_graph = all_results[class_][3]
        test_obj_without_graph = all_results[class_][4]
        test_obj_with_graph = all_results[class_][5]
        test_error_without_graph = all_results[class_][6]
        test_error_with_graph = all_results[class_][7]
        x_axis_class = x_axis[class_]

        fig = plt.figure(figsize=(20,10), facecolor=[1,1,1])
        linestyles = ['-','--',':','-.']
        markers = ['v', 's', '*', 'D']

        ax = fig.add_subplot(1, 1, 1)
        ax.plot(x_axis_class, test_error_without_graph, linewidth=7, linestyle= '--', marker='o', markersize=20, label='Without graph conv.')
        ax.plot(x_axis_class, test_error_with_graph, linewidth=7, linestyle= '--', marker='s', markersize=20, label='With graph conv.')    
        
        ax.set_xlabel(r'$\rho$', fontsize=50)
        ax.set_ylabel('Test error', fontsize=50)
        ax.legend(loc='lower right', fontsize=50)
        plt.xticks(fontsize=40)
        plt.yticks(fontsize=40)
        plt.yscale('linear')
        ax.grid()

        fig.savefig(name + "_class=" + str(class_) + ".pdf", bbox_inches='tight')
        plt.show()

# %% [markdown]
## Generate data function

# %% [code]
def generate_data(data, train_mask, test_mask, lambda_, factor, step_multiplier, n_classes = 2):

    all_results = {}
    x_axis = {}
    
    trials = 5

    for class_ in range(n_classes):
        y_ = idx = data.y.numpy()
        idx = y_ == class_
        y = np.zeros(len(y_), dtype=np.int)
        y[idx] = 1
        
        X_ = data.x.numpy()
        
        n = X_.shape[0]
        n_features = X_.shape[1]
                
        node_indices = np.asarray(range(0,n))
        C1 = node_indices[y == 0]
        C2 = node_indices[y == 1]

        np.sum(np.mean(X_[1-y,:],0))

        X = np.zeros((n,n_features+1))
        X[:,:-1] = X_
        X[:,-1]  = np.ones(n)
        
        alpha = np.sum(y[train_mask] == 0)/np.sum(y == 0)
        beta = np.sum(y[train_mask] == 1)/np.sum(y == 1)
        
        print("class:", chr(65 + class_), " n: ", n, " d: ", n_features, " d(mu,nu): ", np.linalg.norm(np.mean(X_[C1,:],0) - np.mean(X_[C2,:],0)), " alpha: ", alpha, " beta: ", beta)
        
#         print("& " + chr(65 + class_) + " & $"+ '{0:.1e}'.format(alpha) + "$ & $" + '{0:.1e}'.format(beta) + "$ & $" + '{0:.1e}'.format(np.linalg.norm(np.mean(X_[C1,:],0) - np.mean(X_[C2,:],0))) + "$")

        rows = data.edge_index[0].numpy() 
        cols = data.edge_index[1].numpy()
        A = sp.sparse.coo_matrix((np.ones(len(rows)), (rows, cols)), shape=(n, n))
        A.setdiag(A.diagonal() + 1)

        d_mat = np.sum(A, axis=0)
        dinv_mat = 1/d_mat
        d = d_mat.tolist()[0]
        dinv = dinv_mat.tolist()[0]
        D = sp.sparse.diags(d, 0)
        Dinv = sp.sparse.diags(dinv, 0)

        # Create data
        DAX_ = Dinv@A@X_

        # Append a column of ones for the coefficients of the bias
        DAX = np.zeros((n,n_features+1))
        DAX[:,:-1] = DAX_
        DAX[:,-1]  = np.ones(n)

        w = ipm(n_features, train_mask, 100, X, y, False, lambda_=lambda_)
        w_graph = ipm(n_features, train_mask, 100, DAX, y, False, lambda_=lambda_)

        B = A.todense().copy()

        B[C1,C1] = 1
        B[C2,C2] = 1

        new_rows = (1-B).nonzero()[0]
        new_cols = (1-B).nonzero()[1]

        max_how_many = new_rows.shape[0]

        n_cross_edges = np.long(y.T@A@(1-y))
        
        x_axis_class = np.asarray(range(0,np.long(factor*n_cross_edges),np.long(step_multiplier*n_cross_edges)))/n_cross_edges

        train_obj_without_graph = np.zeros(len(x_axis_class))
        train_obj_with_graph = np.zeros(len(x_axis_class))
        train_error_without_graph = np.zeros(len(x_axis_class))
        train_error_with_graph = np.zeros(len(x_axis_class))
        test_obj_without_graph = np.zeros(len(x_axis_class))
        test_obj_with_graph = np.zeros(len(x_axis_class))
        test_error_without_graph = np.zeros(len(x_axis_class))
        test_error_with_graph = np.zeros(len(x_axis_class))
        
        for trial in range(trials):
            
            perm_new_rows = np.random.permutation(new_rows)
            perm_new_cols = np.random.permutation(new_cols)

            for idx, how_many in enumerate(np.asarray(range(0,np.long(factor*n_cross_edges),np.long(step_multiplier*n_cross_edges)))):

                pick_from_new_rows = perm_new_rows[0:how_many]
                pick_from_new_cols = perm_new_cols[0:how_many]

                rows = np.append(data.edge_index[0].numpy(), pick_from_new_rows) 
                cols = np.append(data.edge_index[1].numpy(), pick_from_new_cols)

                A = sp.sparse.coo_matrix((np.ones(len(rows)), (rows, cols)), shape=(n, n))
                A.setdiag(A.diagonal() + 1)

                d_mat = np.sum(A, axis=0)
                dinv_mat = 1/d_mat
                d = d_mat.tolist()[0]
                dinv = dinv_mat.tolist()[0]
                D = sp.sparse.diags(d, 0)
                Dinv = sp.sparse.diags(dinv, 0)

                DAX_ = Dinv@A@X_
                DAX = np.zeros((n,n_features+1))
                DAX[:,:-1] = DAX_
                DAX[:,-1]  = np.ones(n)

                sigma = 1/(1+np.exp(-X@w))
                sigma = sigma[train_mask]
                obj = np.sum(-y[train_mask]*np.log(sigma + 1.0e-12) - (1-y[train_mask])*np.log(1-sigma + 1.0e-12))/n
                pred_y_train = np.zeros(len(sigma))
                pred_y_train[sigma > 0.5] = 1
                error_train = np.linalg.norm(y[train_mask] - pred_y_train)**2/y[train_mask].shape[0]

                train_obj_without_graph[idx] += obj
                train_error_without_graph[idx] += error_train

                sigma = 1/(1+np.exp(-DAX@w_graph))
                sigma = sigma[train_mask]
                obj = np.sum(-y[train_mask]*np.log(sigma + 1.0e-12) - (1-y[train_mask])*np.log(1-sigma + 1.0e-12))/n
                pred_y_train = np.zeros(len(sigma))
                pred_y_train[sigma > 0.5] = 1
                error_train = np.linalg.norm(y[train_mask] - pred_y_train)**2/y[train_mask].shape[0]

                train_obj_with_graph[idx] += obj
                train_error_with_graph[idx] += error_train

                sigma = 1/(1+np.exp(-X@w))
                sigma = sigma[test_mask]
                obj = np.sum(-y[test_mask]*np.log(sigma + 1.0e-12) - (1-y[test_mask])*np.log(1-sigma + 1.0e-12))/n
                pred_y_train = np.zeros(len(sigma))
                pred_y_train[sigma > 0.5] = 1
                error_test = np.linalg.norm(y[test_mask] - pred_y_train)**2/y[test_mask].shape[0]

                test_obj_without_graph[idx] += obj
                test_error_without_graph[idx] += error_test

                sigma = 1/(1+np.exp(-DAX@w_graph))
                sigma = sigma[test_mask]
                obj = np.sum(-y[test_mask]*np.log(sigma + 1.0e-12) - (1-y[test_mask])*np.log(1-sigma + 1.0e-12))/n
                pred_y_train = np.zeros(len(sigma))
                pred_y_train[sigma > 0.5] = 1
                error_test = np.linalg.norm(y[test_mask] - pred_y_train)**2/y[test_mask].shape[0]

                test_obj_with_graph[idx] += obj
                test_error_with_graph[idx] += error_test
                
        train_obj_without_graph /= trials
        train_obj_with_graph /= trials
        train_error_without_graph /= trials
        train_error_with_graph /= trials
        test_obj_without_graph /= trials
        test_obj_with_graph /= trials
        test_error_without_graph /= trials
        test_error_with_graph /= trials

        all_results[class_] = [train_obj_without_graph,train_obj_with_graph,train_error_without_graph,train_error_with_graph,test_obj_without_graph,test_obj_with_graph,test_error_without_graph,test_error_with_graph]
        x_axis[class_] = x_axis_class
    return all_results, x_axis

# %% [markdown]
## Cora

# %% [code]
from torch_geometric.datasets import Planetoid

# %% [code]
dataset = Planetoid(root='data/Cora/', name='Cora')
name = 'Cora'

# %% [code]
data = dataset.data
n_classes = data.y.numpy().max()+1
all_results, x_axis = generate_data(data, data.train_mask, data.test_mask, lambda_=1.0e-6, factor=60, step_multiplier=4, n_classes=n_classes)
plot_(all_results,x_axis,name,n_classes)

# %% [markdown]
## PubMed

# %% [code]
dataset = Planetoid(root='data/PubMed/', name='PubMed')
name = 'PubMed'

# %% [code]
data = dataset.data
n_classes = data.y.numpy().max()+1
all_results, x_axis = generate_data(data, data.train_mask, data.test_mask, lambda_=1.0e-6, factor=7.2, step_multiplier=0.5, n_classes=n_classes)
plot_(all_results,x_axis,name,n_classes)

# %% [markdown]
## WikipediaNetworks

# %% [code]
from torch_geometric.datasets import WikipediaNetwork
dataset = WikipediaNetwork(root='data/WikipediaNetwork/', name='Chameleon')
name = 'WikipediaNetwork'

# %% [code]
data = dataset.data
n_classes = int(data.y.numpy().max())+1
all_results, x_axis = generate_data(data, data.train_mask[:,0].numpy(), data.test_mask[:,0].numpy(), lambda_=1.0e-3, factor=5, step_multiplier=0.5, n_classes=n_classes)
plot_(all_results,x_axis,name,n_classes)

# %% [code]
